# Supplementary material for: Insights into the denaturation of bovine serum albumin with a thermo-responsive ionic liquid
Source: Royal Society of Chemistry journal article supplement (doi:10.1039/c4sm00941j), 2014-01-01
Supplement: c4sm00941j1.pdf [file c4sm00941j1.pdf]

## Supporting Information

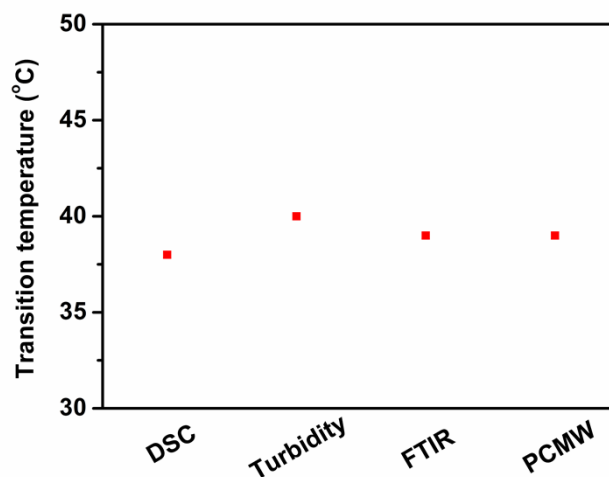

Fig. S1 Transition temperature obtained from different measurements.

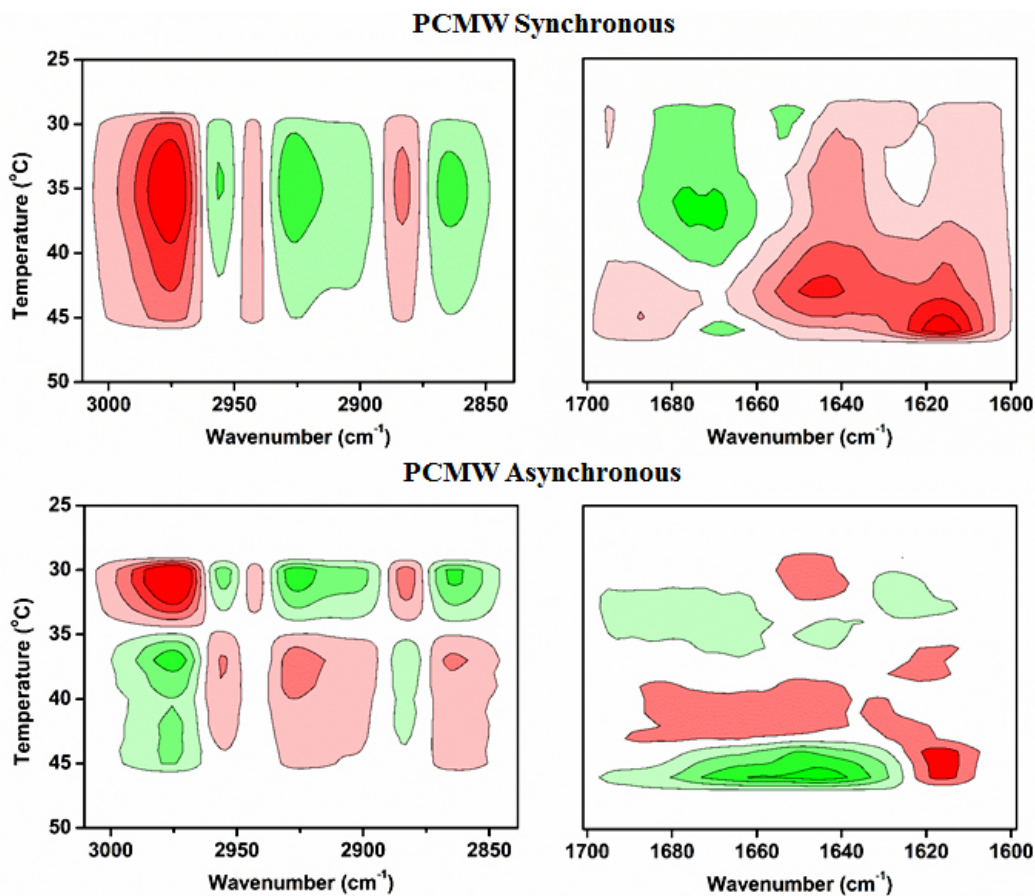

Fig. S2 PCMW synchronous and asynchronous spectra of [P<sub>4,4,4,4</sub>][SS]-BSA-D<sub>2</sub>O solution between 25 and 50 °C during cooling. Red colors are defined as positive intensities, whereas green colors are defined as negative intensities.

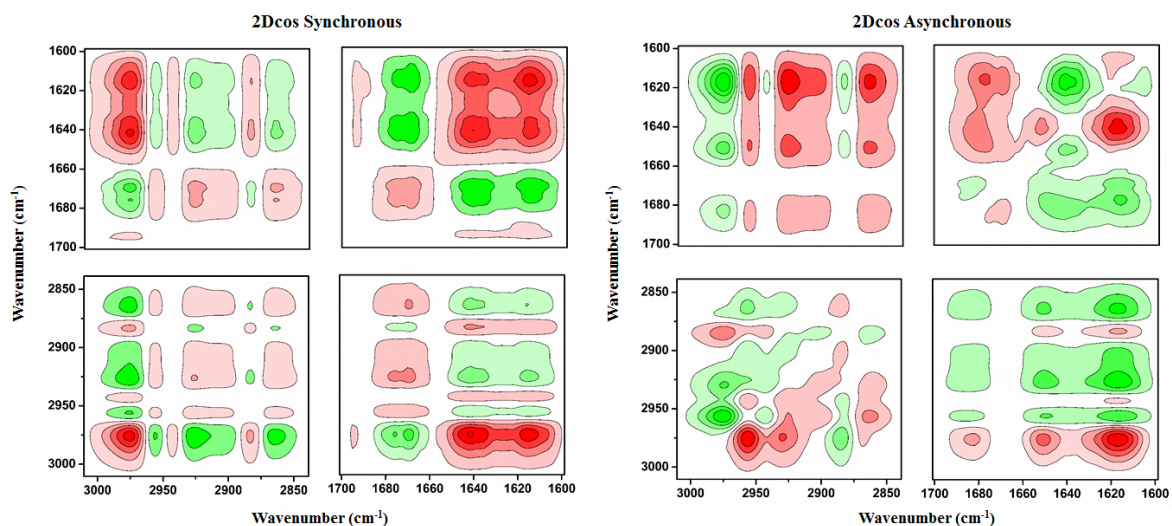

**Fig. S3** 2DCOS synchronous and asynchronous spectra of  $[P_{4,4,4,4}][SS]$ -BSA- $D_2O$  solution during cooling between 25 and 50 °C. Red colors are defined as positive intensities, while green colors as negative ones.
